# Supplementary material for: Effect of radiotherapy on the expression of cardiovascular disease-related miRNA-146a, -155, -221 and -222 in blood of women with breast cancer
Source: PLoS One. 2019 May 31;14(5):e0217443. doi: 10.1371/journal.pone.0217443 (PMC6544229; doi:10.1371/journal.pone.0217443)
Supplement: S2 Table — BC, breast cancer; RT, radiotherapy; miRNA, microRNA. Mean ± SEM of the expression (log(2-DCt)+3) of selected miRNAs is shown. Statistics: Single factor ANOVA test. p value indicates differences between groups. BC, breast cancer; RT, radiotherapy; miRNA, microRNA. miRNA expression was calculated as log(2-DCt)+3. Pearson correlation coefficient (r) is shown. **means significant differences at p<0.01 (bilateral). (DOCX) [file pone.0217443.s002.docx]

**Supporting information**

**Table S2. Expression of selected miRNAs expression in blood of BC patients at pre-RT control and post-RT depending on RT scheduled and hormonal therapy.**

| |  | **Pre-RT control** | | | **Post-RT** | | | | --- | --- | --- | --- | --- | --- | --- | | **RT scheduled** | **Normofractionated**  **(82.35 %)** | **Hypofractionated**  **(17.65%)** | **p value** | **Normofractionated**  **(82.35 %)** | **Hypofractionated**  **(17.65%)** | **p value** | | **miRNA-146a** | 2.33±0.039 | 2.35±0.078 | 0.785 | 2.39±0.038 | 2.46±0.068 | 0.444 | | **miRNA-155** | 2.04±0.041 | 2.029±0.082 | 0.940 | 2.06±0.040 | 2.12±0.082 | 0.514 | | **miRNA-221** | 2.65±0.044 | 2.68±0.074 | 0.793 | 2.74±0.039 | 2.79±0.085 | 0.603 | | **miRNA-222** | 3.31±0.045 | 3.30±0.084 | 0.939 | 3.42±0.042 | 3.45±0.095 | 0.814 | | **Hormonal therapy** | **No**  **(21.3%)** | **Yes**  **(78.7%)** | **p value** | **No**  **(21.3%)** | **Yes**  **(78.7%)** | **p value** | | **miRNA-146a** | 2.25±0.074 | 2.34±0.041 | 0.346 | 2.30±0.090 | 2.43±0.037 | 0.151 | | **miRNA-155** | 1.96±0.084 | 2.05±0.042 | 0.398 | 2.07±0.094 | 2.08±0.041 | 0.928 | | **miRNA-221** | 2.62±0.090 | 2.66±0.043 | 0.716 | 2.70±0.100 | 2.76±0.039 | 0.542 | | **miRNA-222** | 3.26±0.081 | 3.31±0.045 | 0.680 | 3.40±0.119 | 3.44±0.041 | 0.698 | |  | | | | | | | |
| --- | --- | --- | --- | --- | --- | --- | --- | --- | --- | --- | --- | --- | --- | --- | --- | --- | --- | --- | --- | --- | --- | --- | --- | --- | --- | --- | --- | --- | --- | --- | --- | --- | --- | --- | --- | --- | --- | --- | --- | --- | --- | --- | --- | --- | --- | --- | --- | --- | --- | --- | --- | --- | --- | --- | --- | --- | --- | --- | --- | --- | --- | --- | --- | --- | --- | --- | --- | --- | --- | --- | --- | --- | --- | --- | --- | --- | --- | --- | --- | --- | --- | --- | --- | --- |

BC, breast cancer; RT, radiotherapy; miRNA, microRNA.

Mean ± SEM of the expression (log(2-DCt)+3) of selected miRNAs is shown. Statistics: Single factor ANOVA test. p value indicates differences between groups.

BC, breast cancer; RT, radiotherapy; miRNA, microRNA.

miRNA expression was calculated as log(2-DCt)+3. Pearson correlation coefficient (r) is shown. **means significant differences at p<0.01 (bilateral).
